# Supplementary material for: Dissolution performance of cellulose in [A2im][MOA]/MIM solvents
Source: Royal Society of Chemistry journal article supplement (doi:10.1039/c9ra03979a), 2019-01-01
Supplement: c9ra03979a1.pdf [file c9ra03979a1.pdf]

## Supplementary Information

### **Dissolution performance of cellulose in [A<sub>2</sub>im][MOA]/MIM solvents**

**Airong Xu<sup>a,\*</sup>, Yongxin Wang<sup>a</sup>, Changzhu Li<sup>b,c</sup>, Zhihong Xiao<sup>b,c</sup> and Rukuan Liu<sup>b,c,\*</sup>**

<sup>a</sup> *School of Chemical Engineering and Pharmaceutics, Henan University of Science and Technology, Luoyang, Henan 471003, PR China*

<sup>b</sup> *Hunan Academy of Forestry, Changsha, Hunan 410004, PR China*

<sup>c</sup> *Hunan Collaborative Innovation Centre for Effective Utilizing of Wood Bamboo Resources, Changsha, Hunan 410004, PR China*

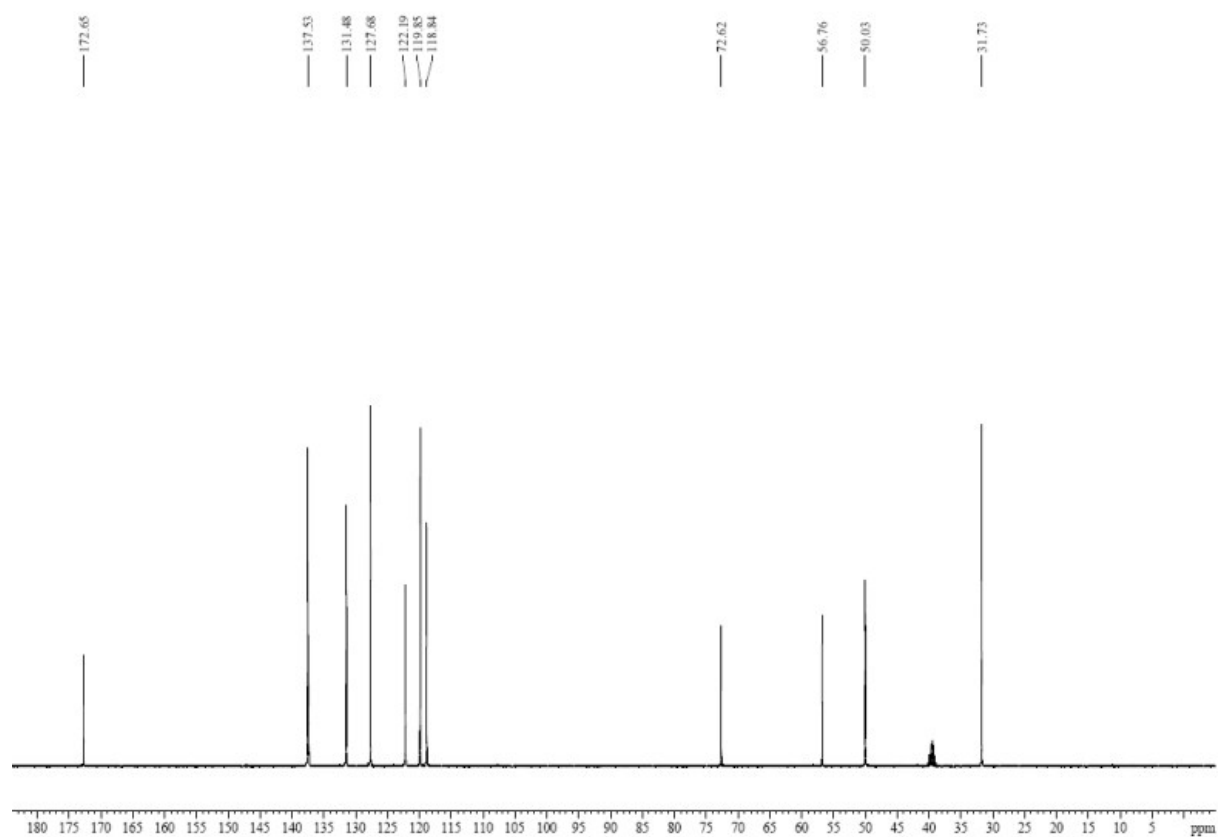

**Fig. S1**  $^{13}\text{C}$  NMR spectra of  $[\text{A}_2\text{im}][\text{CH}_3\text{OCH}_2\text{COO}]$  in  $[\text{A}_2\text{im}][\text{CH}_3\text{OCH}_2\text{COO}]/\text{MIM}(R_{\text{MIM}}=2)$  solvent at room temperature.

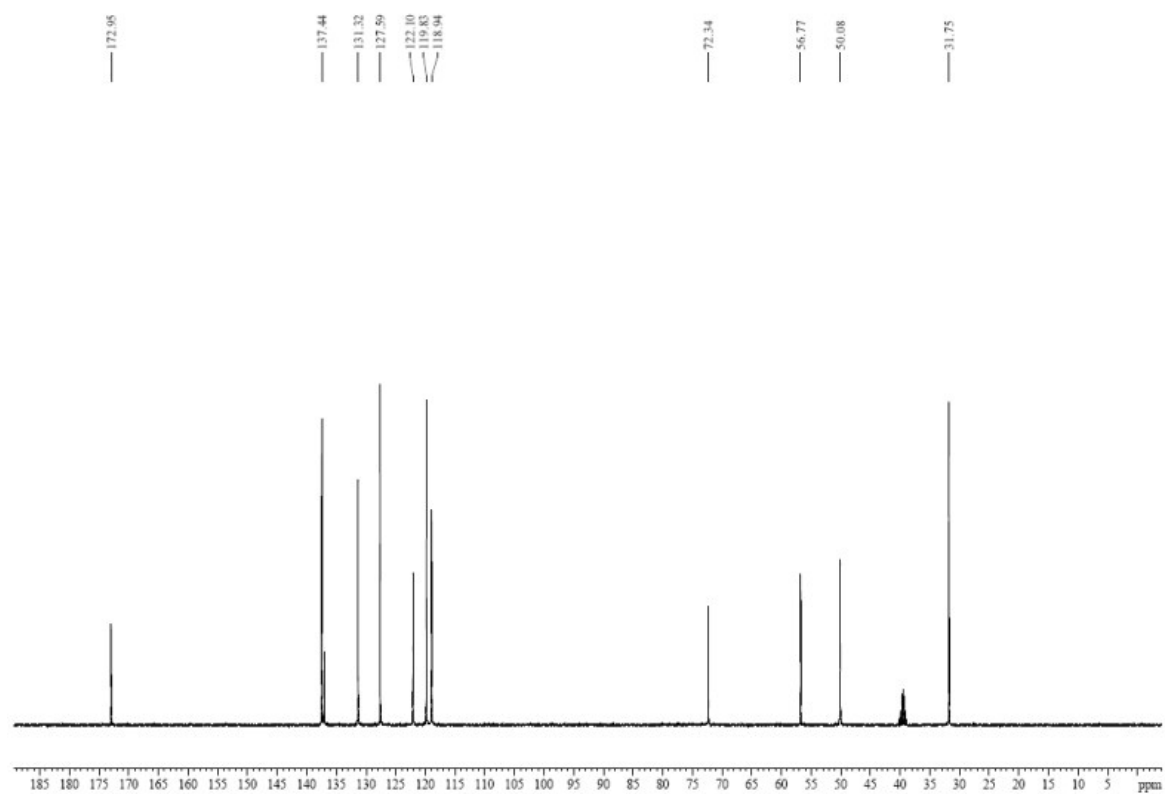

**Fig. S2**  $^{13}\text{C}$  NMR spectra of  $[\text{A}_2\text{im}][\text{CH}_3\text{OCH}_2\text{COO}]$  in  $[\text{A}_2\text{im}][\text{CH}_3\text{OCH}_2\text{COO}]/\text{MIM}(R_{\text{MIM}}=2)/\text{cellulose}(8\%)$  solution at room temperature.
